# Supplementary material for: An Outbreak of Subclinical Mastitis in a Dairy Herd Caused by a Novel Streptococcus canis Sequence Type (ST55)
Source: MDPI journal article supplement (doi:10.3390/ani11020550), 2021-02-20
Supplement: s1 [file s1]

Supplementary material

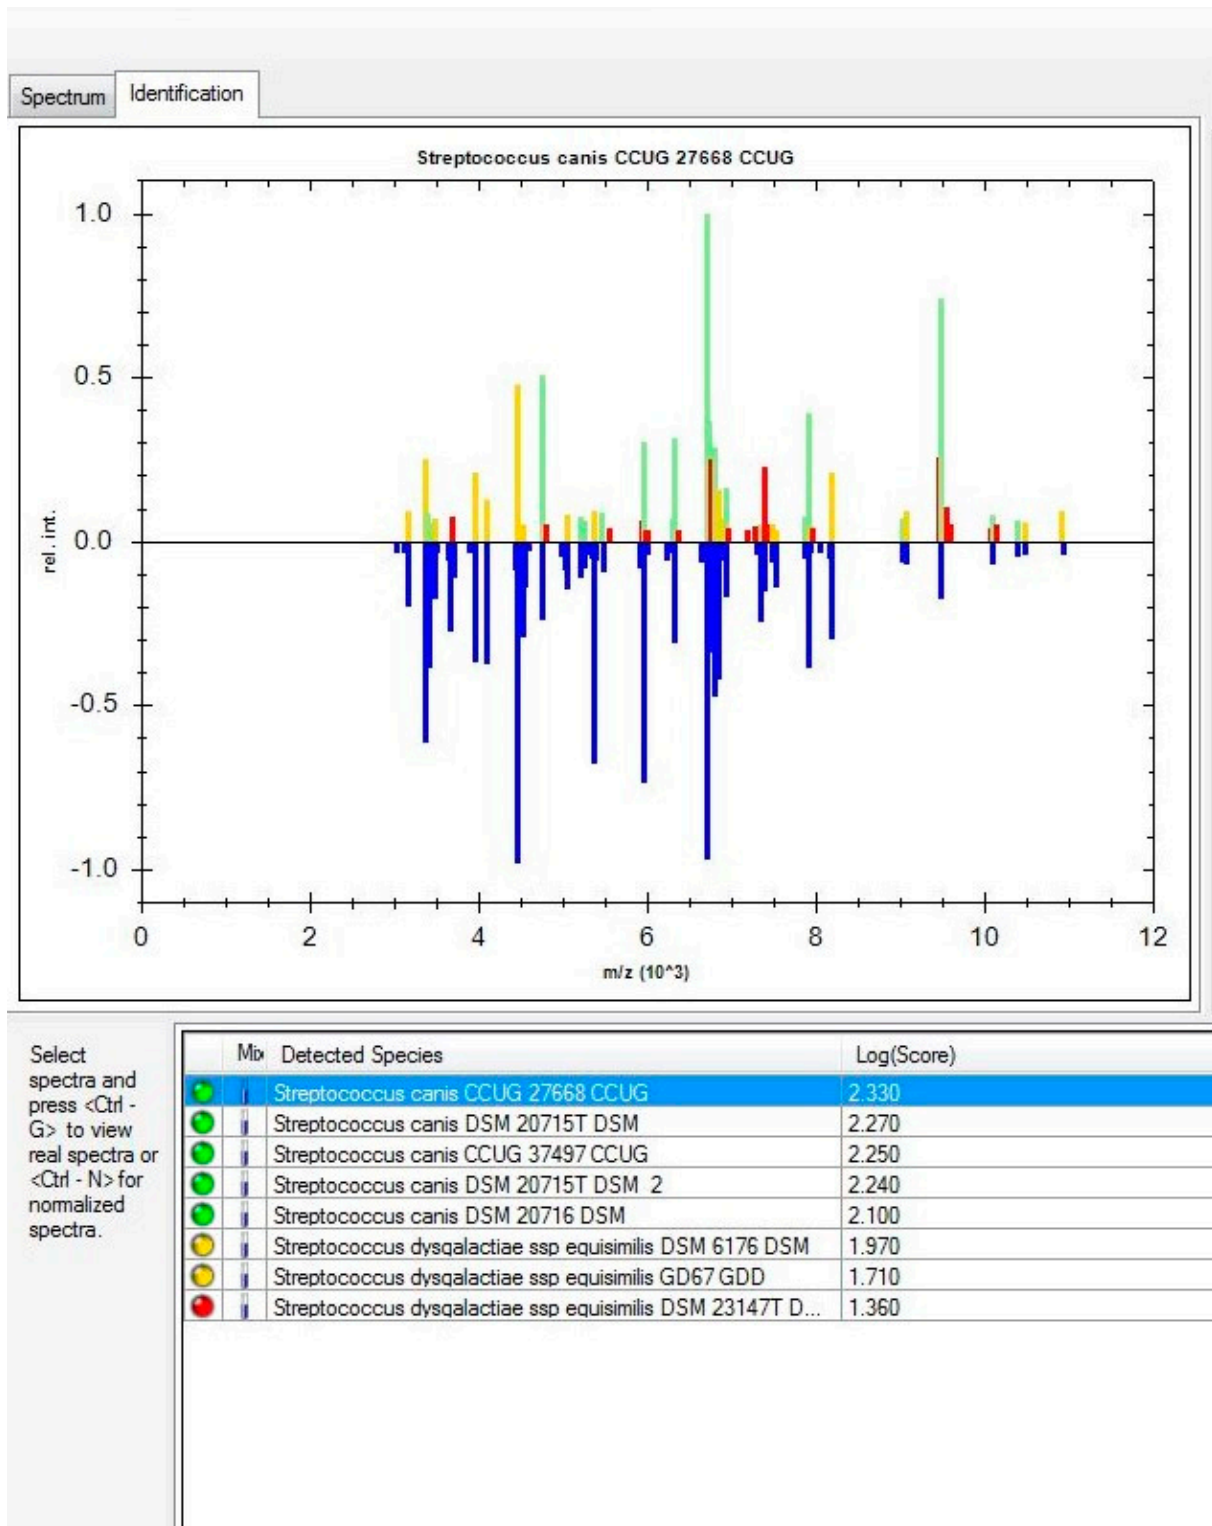

Figure S1. Identification of a streptococcal isolate as *S. canis* using MALDI-TOF mass spectrometry producing log scores above 2.000.
